# Supplementary material
Source: Elsevier journal article supplement (https://comptes-rendus.academie-sciences.fr/geoscience/article/10.1016/j.crte.2018.06.004/file/attach/mmc1.pdf)
Supplement: mmc1 [file mmc1.pdf]

Percentage

Classification of zircon morphotypes (Pupin, 1980)

Morphotypes forming the major clusters in this study

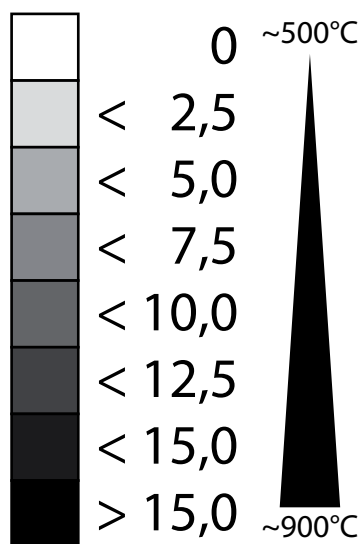

|    |     |     |     |     |     |      |    |
|----|-----|-----|-----|-----|-----|------|----|
| B  | AB1 | AB2 | AB3 | AB4 | AB5 | A    | C  |
| H  | L1  | L2  | L3  | L4  | L5  | G1-3 | I  |
| Q1 | S1  | S2  | S3  | S4  | S5  | P1   | R1 |
| Q2 | S6  | S7  | S8  | S9  | S10 | P2   | R2 |
| Q3 | S11 | S12 | S13 | S14 | S15 | P3   | R3 |
| Q4 | S16 | S17 | S18 | S19 | S20 | P4   | R4 |
| Q5 | S21 | S22 | S23 | S24 | S25 | P5   | R5 |
| E  | J1  | J2  | J3  | J4  | J5  | D    | F  |

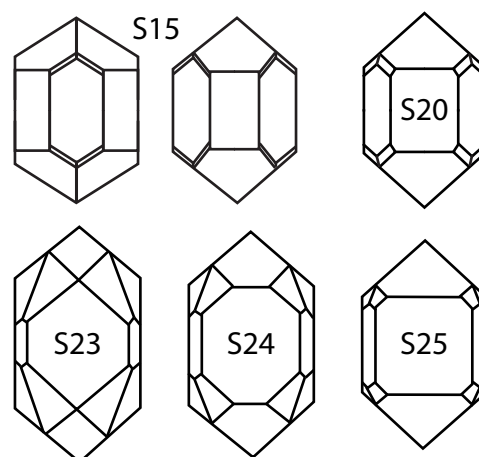

Sebkha Gezmayet unit,  
zircon morphotypes,  
n = 313/517

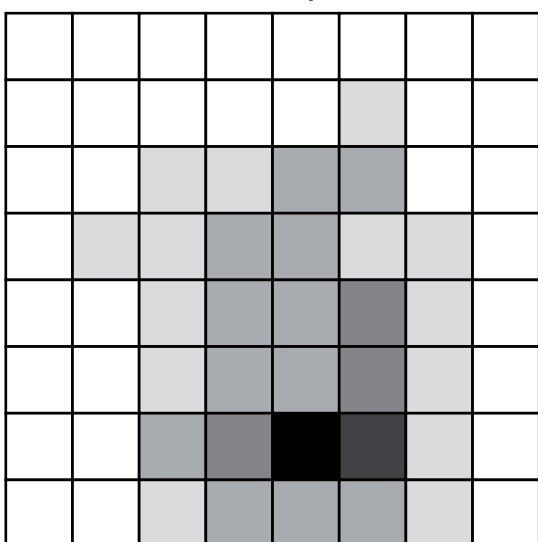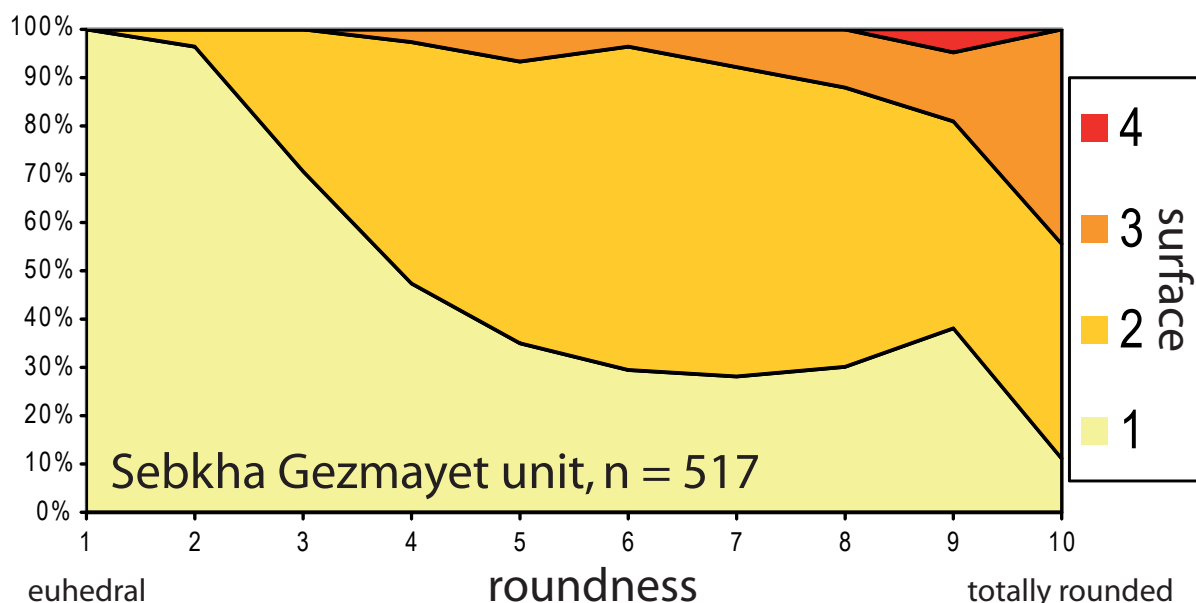

**Supplementary figure 1:** Morphotype distribution of all definable zircon grains from the Sebkha Gezmayet unit using the classification of Pupin (1980), roundness (classes 1–10, euhedral to completely rounded, x-axis) vs. surface (percentage of classes 1–4, entirely smooth to totally pitted, y-axis) of all studied zircon grains from the Sebkha Gezmayet unit using the classification of Gärtner et al. (2013b, lower right).
